# Supplementary material for: Identification of diagnostic biomarkers and potential therapeutic targets for biliary atresia via WGCNA and machine learning methods
Source: Front Pediatr. 2024 Jun 26;12:1339925. doi: 10.3389/fped.2024.1339925 (PMC11233743; doi:10.3389/fped.2024.1339925)
Supplement: Supplementary file 5 [file Table4.xls]

## Sheet: Table S4
ID	Description	GeneRatio	BgRatio	pvalue	p.adjust	qvalue	geneID	Count
hsa04510	Focal adhesion	80/1384	201/8220	3.91514e-15	1.26459e-12	7.74786e-13	ACTG1/ACTN4/AKT3/ARHGAP5/BCAR1/BCL2/BIRC2/CAPN2/CAV1/CAV2/CCND2/CDC42/COL1A1/COL1A2/COL2A1/COL4A1/COL4A2/COL4A5/COL6A1/COL6A2/COL6A3/CTNNB1/FLNA/FLNB/FLNC/FYN/GSK3B/IGF1R/ILK/ITGA2/ITGA3/ITGA5/ITGA6/ITGAV/ITGB1/ITGB3/ITGB5/ITGB6/ITGB8/JUN/LAMA1/LAMA2/LAMA3/LAMA4/LAMA5/LAMB1/LAMB3/LAMC1/LAMC2/LAMC3/MAPK1/MAPK10/MAPK8/MYL12A/MYL12B/PAK1/PDGFA/PDGFC/PDGFD/PDGFRA/PDGFRB/PDPK1/PIK3CB/PIK3R3/PIP5K1A/PP…	80
hsa05132	Salmonella infection	91/1384	249/8220	2.31936e-14	3.74577e-12	2.29495e-12	ABI1/ACBD3/ACTG1/ACTR10/ACTR2/ACTR3/AHNAK/AKT3/ANXA2/ARF6/ARL8B/ARPC2/ARPC3/ARPC5/BAK1/BCL2/BIRC2/CASP3/CASP8/CDC42/CTNNB1/CXCL8/CYFIP1/CYTH2/CYTH3/DCTN2/DCTN4/DCTN5/DYNC1H1/DYNC1I2/DYNC1LI2/DYNC2H1/DYNC2LI1/DYNLRB1/DYNLT1/EXOC2/FLNA/FLNB/FLNC/IL18/IL1B/IL6/JUN/KIF5B/KLC1/KLC2/KPNA3/KPNA4/LEF1/LY96/MAP2K4/MAP3K7/MAPK1/MAPK10/MAPK13/MAPK8/MLKL/MYL12A/MYL12B/MYO6/NCKAP1/NFKB1/NFKBIA/NOD1/PAK1/PIK3C…	91
hsa05145	Toxoplasmosis	51/1384	112/8220	9.44902e-13	1.01734e-10	6.23303e-11	AKT3/BCL2/BCL2L1/BIRC2/CASP3/CASP8/GNAI1/GNAI3/HLA-DMA/HLA-DMB/HLA-DPA1/HLA-DQA1/HLA-DQB1/HLA-DRA/HLA-DRB1/HLA-DRB3/HLA-DRB5/HSPA2/HSPA6/IFNGR1/IFNGR2/IL10RB/ITGA6/ITGB1/JAK1/LAMA1/LAMA2/LAMA3/LAMA4/LAMA5/LAMB1/LAMB3/LAMC1/LAMC2/LAMC3/LY96/MAP3K7/MAPK1/MAPK10/MAPK13/MAPK8/NFKB1/NFKBIA/PDPK1/PIK3CG/PIK3R5/STAT1/TGFB1/TGFB2/TGFB3/TLR4	51
hsa05165	Human papillomavirus infection	105/1384	331/8220	8.05282e-12	6.50265e-10	3.98403e-10	AKT3/ATP6V0C/ATP6V1B2/ATP6V1C1/ATP6V1D/ATP6V1E1/ATP6V1F/ATP6V1G1/ATP6V1H/BAK1/CASP3/CASP8/CCND2/CDC42/CDK6/CHD4/COL1A1/COL1A2/COL2A1/COL4A1/COL4A2/COL4A5/COL6A1/COL6A2/COL6A3/CREB3L1/CREB5/CSNK1A1/CTNNB1/DLG3/EIF2AK2/FAS/FZD6/GNAS/GSK3B/HDAC2/HEY1/HEYL/HLA-A/HLA-B/HLA-C/HLA-E/HLA-G/IFNA14/IFNAR2/IRF1/IRF9/ITGA2/ITGA3/ITGA5/ITGA6/ITGAV/ITGB1/ITGB3/ITGB5/ITGB6/ITGB8/JAG1/JAK1/LAMA1/LAMA2/LAMA3/LAMA…	105
hsa04145	Phagosome	59/1384	152/8220	5.8008e-11	3.74732e-09	2.2959e-09	ACTG1/ATP6V0C/ATP6V1B2/ATP6V1C1/ATP6V1D/ATP6V1E1/ATP6V1F/ATP6V1G1/ATP6V1H/CLEC7A/CTSS/CYBA/DYNC1H1/DYNC1I2/DYNC1LI2/DYNC2H1/EEA1/FCAR/FCGR1A/FCGR2A/HLA-A/HLA-B/HLA-C/HLA-DMA/HLA-DMB/HLA-DPA1/HLA-DQA1/HLA-DQB1/HLA-DRA/HLA-DRB1/HLA-DRB3/HLA-DRB5/HLA-E/HLA-G/ITGA2/ITGA5/ITGAM/ITGAV/ITGB1/ITGB2/ITGB3/ITGB5/LAMP1/LAMP2/MRC2/MSR1/NCF2/OLR1/RAC1/STX12/STX18/TAP1/THBS1/THBS2/THBS3/TLR4/TUBA1A/TUBA1B/VAMP3	59
hsa05222	Small cell lung cancer	42/1384	92/8220	8.8419e-11	4.75989e-09	2.91628e-09	AKT3/APAF1/BAK1/BCL2/BCL2L1/BIRC2/CASP3/CDK6/CKS2/COL4A1/COL4A2/COL4A5/E2F2/E2F3/FHIT/GADD45A/ITGA2/ITGA3/ITGA6/ITGAV/ITGB1/LAMA1/LAMA2/LAMA3/LAMA4/LAMA5/LAMB1/LAMB3/LAMC1/LAMC2/LAMC3/MAX/NFKB1/NFKBIA/PIK3CB/PIK3R3/PTEN/PTGS2/RARB/RB1/TRAF1/TRAF5	42
hsa05205	Proteoglycans in cancer	72/1384	205/8220	1.10125e-10	5.08149e-09	3.11331e-09	ACTG1/AKT3/ANK1/ANK2/CAMK2D/CASP3/CAV1/CAV2/CBL/CD44/CD63/CDC42/COL1A1/COL1A2/CTNNB1/CTTN/DCN/DDX5/EZR/FAS/FGFR1/FLNA/FLNB/FLNC/FZD6/GPC3/HBEGF/HCLS1/HIF1A/HPSE/HSPG2/IGF1R/IQGAP1/ITGA2/ITGA5/ITGAV/ITGB1/ITGB3/ITGB5/ITPR3/LUM/MAPK1/MAPK13/MIR21/MMP2/MRAS/MSN/NANOG/NRAS/PAK1/PDPK1/PIK3CB/PIK3R3/PLAU/PLAUR/PLCE1/PLCG1/PPP1CB/PPP1R12A/PPP1R12B/RAC1/RHOA/ROCK1/SLC9A1/SMAD2/SOS2/TGFB1/TGFB2/THBS1/TIMP…	72
hsa04933	AGE-RAGE signaling pathway in diabetic complications	44/1384	100/8220	1.41432e-10	5.71031e-09	3.49858e-09	AKT3/BCL2/CASP3/CCL2/CDC42/COL1A1/COL1A2/COL3A1/COL4A1/COL4A2/COL4A5/CXCL8/EDN1/EGR1/F3/IL1B/IL6/JUN/MAPK1/MAPK10/MAPK13/MAPK8/MMP2/NFKB1/NOX4/NRAS/PIK3CB/PIK3R3/PLCB4/PLCD3/PLCE1/PLCG1/PRKCD/RAC1/SERPINE1/SMAD2/SMAD3/SMAD4/STAT1/TGFB1/TGFB2/TGFB3/TGFBR1/TGFBR2	44
hsa04512	ECM-receptor interaction	40/1384	88/8220	2.92954e-10	1.00742e-08	6.17225e-09	AGRN/CD44/CD47/COL1A1/COL1A2/COL2A1/COL4A1/COL4A2/COL4A5/COL6A1/COL6A2/COL6A3/DAG1/FRAS1/HSPG2/ITGA2/ITGA3/ITGA5/ITGA6/ITGAV/ITGB1/ITGB3/ITGB5/ITGB6/ITGB8/LAMA1/LAMA2/LAMA3/LAMA4/LAMA5/LAMB1/LAMB3/LAMC1/LAMC2/LAMC3/NPNT/SPP1/THBS1/THBS2/THBS3	40
hsa05130	Pathogenic Escherichia coli infection	69/1384	197/8220	3.11896e-10	1.00742e-08	6.17225e-09	ABI1/ABL1/ACTG1/ACTR2/ACTR3/ARF6/ARHGEF2/ARPC2/ARPC3/ARPC5/BAIAP2L1/BAK1/CASP3/CASP8/CDC42/CLDN1/CLDN10/CLDN11/CLDN16/CLDN4/CLDN6/CLDN7/CTTN/CXCL8/CYFIP1/CYTH2/CYTH3/EZR/F2R/FAS/FCGR2A/FYN/GNA12/GNA13/HCLS1/IL18/IL1B/IL1R1/IL6/ITGB1/JUN/LPAR1/MAP3K7/MAPK1/MAPK10/MAPK13/MAPK8/MYH9/MYO1C/MYO1D/MYO1E/MYO5A/MYO6/NCK2/NCKAP1/NFKB1/NFKBIA/PAK1/RAC1/RHOA/ROCK1/RPS3/TJP1/TLR4/TLR5/TNFRSF10B/TUBA1A/TUBA1B…	69
hsa05323	Rheumatoid arthritis	41/1384	93/8220	5.59968e-10	1.53698e-08	9.41672e-09	ACP5/ANGPT1/ATP6V0C/ATP6V1B2/ATP6V1C1/ATP6V1D/ATP6V1E1/ATP6V1F/ATP6V1G1/ATP6V1H/CCL2/CCL20/CD86/CSF1/CTLA4/CTSK/CXCL1/CXCL5/CXCL6/CXCL8/HLA-DMA/HLA-DMB/HLA-DPA1/HLA-DQA1/HLA-DQB1/HLA-DRA/HLA-DRB1/HLA-DRB3/HLA-DRB5/IL18/IL1B/IL23A/IL6/ITGB2/JUN/LTB/TGFB1/TGFB2/TGFB3/TLR4/TNFSF11	41
hsa05416	Viral myocarditis	31/1384	60/8220	5.71014e-10	1.53698e-08	9.41672e-09	ABL1/ABL2/ACTG1/CASP3/CASP8/CAV1/CD86/CXADR/DAG1/EIF4G2/FYN/HLA-A/HLA-B/HLA-C/HLA-DMA/HLA-DMB/HLA-DPA1/HLA-DQA1/HLA-DQB1/HLA-DRA/HLA-DRB1/HLA-DRB3/HLA-DRB5/HLA-E/HLA-G/ITGB2/LAMA1/LAMA2/RAC1/SGCB/SGCD	31
hsa04380	Osteoclast differentiation	50/1384	128/8220	1.32278e-09	3.2866e-08	2.01363e-08	ACP5/AKT3/CSF1/CTSK/CYBA/CYLD/FCGR1A/FCGR2A/FHL2/FOSB/FOSL2/FYN/GAB2/IFNAR2/IFNGR1/IFNGR2/IL1B/IL1R1/IRF9/ITGB3/JAK1/JUN/JUNB/JUND/LCP2/MAP3K7/MAPK1/MAPK10/MAPK13/MAPK8/NCF2/NFATC2/NFKB1/NFKB2/NFKBIA/PIK3CB/PIK3R3/PPP3CA/PPP3CC/RAC1/RELB/STAT1/TGFB1/TGFB2/TGFBR1/TGFBR2/TNFRSF11B/TNFSF11/TREM2/TYROBP	50
hsa05152	Tuberculosis	63/1384	180/8220	1.92839e-09	4.44908e-08	2.72585e-08	AKT3/APAF1/ATP6V0C/ATP6V1H/BCL10/BCL2/CALM1/CAMK2D/CASP3/CASP8/CD74/CLEC4E/CLEC7A/CTSS/EEA1/FCGR1A/FCGR2A/HLA-DMA/HLA-DMB/HLA-DPA1/HLA-DQA1/HLA-DQB1/HLA-DRA/HLA-DRB1/HLA-DRB3/HLA-DRB5/IFNA14/IFNGR1/IFNGR2/IL10RB/IL18/IL1B/IL23A/IL6/IRAK2/ITGAM/ITGAX/ITGB2/JAK1/KSR1/LAMP1/LAMP2/MALT1/MAPK1/MAPK10/MAPK13/MAPK8/MRC2/NFKB1/NFYA/PLK3/PPP3CA/PPP3CC/RFX5/RFXANK/RHOA/RIPK2/SPHK1/STAT1/TGFB1/TGFB2/TGFB3/T…	63
hsa04144	Endocytosis	80/1384	251/8220	2.13757e-09	4.6029e-08	2.82009e-08	ACAP2/ACTR2/ACTR3/AP2B1/ARAP2/ARF3/ARF5/ARF6/ARFGEF1/ARPC2/ARPC3/ARPC5/ASAP2/CAPZB/CAV1/CAV2/CBL/CBLB/CDC42/CHMP1B/CHMP3/CHMP4B/CHMP4C/CHMP5/CLTA/CXCR4/CYTH2/CYTH3/DNM1/EEA1/EHD4/EPS15/GRK5/HLA-A/HLA-B/HLA-C/HLA-E/HLA-G/HSPA2/HSPA6/IGF1R/IL2RG/IST1/KIF5B/PARD3/PARD6B/PDGFRA/PIP5K1A/PRKCI/PSD3/RAB10/RAB11A/RAB11B/RAB11FIP1/RAB22A/RAB31/RAB4A/RABEP1/RHOA/SH3GLB1/SH3KBP1/SMAD2/SMAD3/SMAP1/SMAP2/SMUR…	80
hsa05163	Human cytomegalovirus infection	73/1384	225/8220	4.66224e-09	9.41189e-08	5.76645e-08	ADCY3/AKAP13/AKT3/ATF4/B2M/BAK1/BCAR1/CALM1/CASP3/CASP8/CCL2/CCL4/CCL4L2/CDK6/CREB3L1/CREB5/CTNNB1/CX3CL1/CXCL8/CXCR4/E2F2/E2F3/FAS/GNA12/GNA13/GNAI1/GNAI3/GNAQ/GNAS/GNB1/GNB4/GNG11/GNG12/GNG5/GSK3B/HLA-A/HLA-B/HLA-C/HLA-E/HLA-G/IFNA14/IL10RB/IL1B/IL1R1/IL6/ITGAV/ITGB3/ITPR3/JAK1/MAPK1/MAPK13/NFATC2/NFKB1/NFKBIA/NRAS/PDGFRA/PIK3CB/PIK3R3/PLCB4/PPP3CA/PPP3CC/PTGER2/PTGER4/PTGS2/RAC1/RB1/RHOA/ROCK1…	73
hsa04151	PI3K-Akt signaling pathway	101/1384	354/8220	1.3917e-08	2.64424e-07	1.62006e-07	AKT3/ANGPT1/AREG/ATF4/BCL2/BCL2L1/CCND2/CD19/CDK6/COL1A1/COL1A2/COL2A1/COL4A1/COL4A2/COL4A5/COL6A1/COL6A2/COL6A3/CREB3L1/CREB5/CSF1/CSF3R/EFNA5/EIF4E2/EPHA2/F2R/FGFR1/GNB1/GNB4/GNG11/GNG12/GNG5/GSK3B/IFNA14/IFNAR2/IGF1R/IL2RG/IL3RA/IL6/IL7R/ITGA2/ITGA3/ITGA5/ITGA6/ITGAV/ITGB1/ITGB3/ITGB5/ITGB6/ITGB8/JAK1/KITLG/LAMA1/LAMA2/LAMA3/LAMA4/LAMA5/LAMB1/LAMB3/LAMC1/LAMC2/LAMC3/LPAR1/LPAR6/MAPK1/MCL1/NFKB…	101
hsa04668	TNF signaling pathway	44/1384	114/8220	1.98638e-08	3.25575e-07	1.99473e-07	AKT3/ATF4/BIRC2/CASP3/CASP8/CCL2/CCL20/CFLAR/CREB3L1/CREB5/CSF1/CX3CL1/CXCL1/CXCL10/CXCL5/CXCL6/CYLD/DNM1L/EDN1/FAS/IL1B/IL6/IRF1/JAG1/JUN/JUNB/LIF/MAP2K4/MAP3K7/MAPK1/MAPK10/MAPK13/MAPK8/MLKL/MMP14/NFKB1/NFKBIA/PIK3CB/PIK3R3/PTGS2/RPS6KA5/TNFAIP3/TRAF1/TRAF5	44
hsa04670	Leukocyte transendothelial migration	44/1384	114/8220	1.98638e-08	3.25575e-07	1.99473e-07	ACTG1/ACTN4/ARHGAP5/BCAR1/CDC42/CDH5/CLDN1/CLDN10/CLDN11/CLDN16/CLDN4/CLDN6/CLDN7/CTNNA1/CTNNB1/CTNND1/CXCR4/CYBA/EZR/GNAI1/GNAI3/ITGAM/ITGB1/ITGB2/ITK/JAM2/JAM3/MAPK13/MMP2/MSN/MYL12A/MYL12B/NCF2/PECAM1/PIK3CB/PIK3R3/PLCG1/RAC1/RAP1A/RHOA/RHOH/ROCK1/THY1/VCL	44
hsa05171	Coronavirus disease - COVID-19	73/1384	232/8220	2.01595e-08	3.25575e-07	1.99473e-07	ADAM17/ADAR/C3AR1/C5AR1/CCL2/CXCL10/CXCL8/EIF2AK2/F13A1/FCGR2A/HBEGF/IFNA14/IFNAR2/IL1B/IL6/IRF9/JAK1/JUN/MAP3K7/MAPK1/MAPK10/MAPK13/MAPK8/MX2/NFKB1/NFKBIA/PIK3CB/PIK3R3/PLCG1/RPL10/RPL10A/RPL13A/RPL14/RPL15/RPL17/RPL22/RPL23/RPL23A/RPL26/RPL27/RPL28/RPL31/RPL32/RPL35A/RPL37/RPL37A/RPL38/RPL41/RPL5/RPL6/RPL7/RPL9/RPS14/RPS15/RPS15A/RPS18/RPS20/RPS27A/RPS27L/RPS29/RPS3/RPS3A/RPS4X/RPS7/RPS8/RPSA/R…	73
hsa05131	Shigellosis	76/1384	247/8220	3.01293e-08	4.63417e-07	2.83925e-07	ACTG1/ACTN4/ACTR2/ACTR3/AKT3/ARF6/ARHGEF2/ARPC2/ARPC3/ARPC5/ATG16L1/ATG5/BCAR1/BCL10/BCL2/BCL2L1/CALCOCO2/CAPN2/CAPNS1/CAST/CD44/CDC42/CTTN/CXCL8/CYTH2/CYTH3/FBXW11/FNBP1L/GSK3B/HCLS1/IL18/IL1B/IL1R1/ILK/ITGA5/ITGB1/ITPR3/JUN/MALT1/MAP1LC3B/MAP3K7/MAPK1/MAPK10/MAPK13/MAPK8/MYL12A/MYL12B/NFKB1/NFKBIA/NOD1/PIK3CB/PIK3R3/PLCB4/PLCD3/PLCE1/PLCG1/PRKCD/RAC1/RHOA/RIPK2/ROCK1/RPS27A/RPS6KA5/RRAGA/RRAGC/…	76
hsa05140	Leishmaniasis	33/1384	77/8220	6.26388e-08	9.19651e-07	5.63449e-07	CYBA/EEF1A1/FCGR1A/FCGR2A/HLA-DMA/HLA-DMB/HLA-DPA1/HLA-DQA1/HLA-DQB1/HLA-DRA/HLA-DRB1/HLA-DRB3/HLA-DRB5/IFNGR1/IFNGR2/IL1B/ITGAM/ITGB1/ITGB2/JAK1/JUN/MAP3K7/MAPK1/MAPK13/NCF2/NFKB1/NFKBIA/PTGS2/STAT1/TGFB1/TGFB2/TGFB3/TLR4	33
hsa05167	Kaposi sarcoma-associated herpesvirus infection	62/1384	194/8220	1.27271e-07	1.78733e-06	1.09506e-06	AKT3/BAK1/CALM1/CASP3/CASP8/CD86/CDK6/CLEC2B/CTNNB1/CXCL1/CXCL8/E2F2/E2F3/EIF2AK2/FAS/GNB1/GNB4/GNG11/GNG12/GNG5/GSK3B/HIF1A/HLA-A/HLA-B/HLA-C/HLA-E/HLA-G/IFNA14/IFNAR2/IFNGR1/IL6/IRF9/ITPR3/JAK1/JUN/LEF1/MAP1LC3B/MAP2K4/MAPK1/MAPK10/MAPK13/MAPK8/NFATC2/NFKB1/NFKBIA/NRAS/PIK3CB/PIK3CG/PIK3R3/PIK3R5/PLCG1/PPP3CA/PPP3CC/PREX1/PTGS2/RAC1/RB1/RPS27A/STAT1/TBK1/UBC/ZFP36	62
hsa04514	Cell adhesion molecules	53/1384	157/8220	1.46304e-07	1.90339e-06	1.16617e-06	ALCAM/CD276/CD34/CD58/CD86/CDH5/CLDN1/CLDN10/CLDN11/CLDN16/CLDN4/CLDN6/CLDN7/CNTNAP2/CTLA4/GLG1/HLA-A/HLA-B/HLA-C/HLA-DMA/HLA-DMB/HLA-DPA1/HLA-DQA1/HLA-DQB1/HLA-DRA/HLA-DRB1/HLA-DRB3/HLA-DRB5/HLA-E/HLA-G/ICOSLG/ITGA6/ITGAM/ITGAV/ITGB1/ITGB2/ITGB8/JAM2/JAM3/MPZL1/NCAM2/NEO1/NRCAM/NRXN3/PECAM1/PTPRC/PTPRD/PTPRM/PVR/SELL/SIGLEC1/VCAN/VTCN1	53
hsa04360	Axon guidance	59/1384	182/8220	1.47322e-07	1.90339e-06	1.16617e-06	ABL1/ABLIM1/BMPR2/BOC/CAMK2D/CDC42/CFL1/CXCR4/DPYSL2/EFNA5/EFNB2/ENAH/EPHA2/EPHA3/EPHB2/FYN/GNAI1/GNAI3/GSK3B/ILK/ITGB1/MAPK1/MYL12A/MYL12B/NCK2/NEO1/NFATC2/NRAS/PAK1/PARD3/PARD6B/PDPK1/PIK3CB/PIK3R3/PLCG1/PLXNA1/PLXNA2/PLXNA3/PLXNB2/PPP3CA/PPP3CC/RAC1/RHOA/RND1/ROCK1/RYK/SEMA3C/SEMA3E/SEMA4A/SEMA6A/SLIT2/SRGAP1/SRGAP2/SSH1/SSH2/TRPC4/TRPC6/UNC5C/WNT5A	59
hsa04625	C-type lectin receptor signaling pathway	39/1384	104/8220	3.08405e-07	3.83134e-06	2.34737e-06	AKT3/BCL10/CALM1/CASP8/CBLB/CLEC4E/CLEC6A/CLEC7A/CYLD/IL1B/IL23A/IL6/IRF1/IRF9/ITPR3/JUN/KSR1/MALT1/MAPK1/MAPK10/MAPK13/MAPK8/MRAS/NFATC2/NFKB1/NFKB2/NFKBIA/NRAS/PAK1/PIK3CB/PIK3R3/PLK3/PPP3CA/PPP3CC/PRKCD/PTGS2/RELB/RHOA/STAT1	39
hsa04810	Regulation of actin cytoskeleton	69/1384	229/8220	3.20346e-07	3.83228e-06	2.34795e-06	ABI2/ACTG1/ACTN4/ACTR2/ACTR3/AKT3/ARPC2/ARPC3/ARPC5/BCAR1/BDKRB1/CDC42/CFL1/CXCR4/CYFIP1/ENAH/EZR/F2R/FGFR1/GNA12/GNA13/GNG12/GSN/INSRR/IQGAP1/ITGA2/ITGA3/ITGA5/ITGA6/ITGAM/ITGAV/ITGAX/ITGB1/ITGB2/ITGB3/ITGB5/ITGB6/ITGB8/LPAR1/MAPK1/MRAS/MSN/MYH9/MYL12A/MYL12B/NCKAP1/NRAS/PAK1/PDGFA/PDGFC/PDGFD/PDGFRA/PDGFRB/PIK3CB/PIK3R3/PIP5K1A/PPP1CB/PPP1R12A/PPP1R12B/RAC1/RGCC/RHOA/ROCK1/SLC9A1/SOS2/SSH1/SSH2…	69
hsa05169	Epstein-Barr virus infection	62/1384	202/8220	6.29184e-07	7.25809e-06	4.44686e-06	AKT3/APAF1/B2M/BAK1/BCL2/CASP3/CASP8/CCND2/CD19/CD44/CD58/CDK6/CXCL10/E2F2/E2F3/EIF2AK2/ENTPD1/FAS/GADD45A/HDAC2/HLA-A/HLA-B/HLA-C/HLA-DMA/HLA-DMB/HLA-DPA1/HLA-DQA1/HLA-DQB1/HLA-DRA/HLA-DRB1/HLA-DRB3/HLA-DRB5/HLA-E/HLA-G/IFNA14/IFNAR2/IL6/IRF9/JAK1/JUN/MAP2K4/MAP3K7/MAPK10/MAPK13/MAPK8/NFKB1/NFKB2/NFKBIA/PIK3CB/PIK3R3/RAC1/RB1/RBPJ/RELB/SNW1/STAT1/TAP1/TBK1/TNFAIP3/TRAF5/USP7/VIM	62
hsa04071	Sphingolipid signaling pathway	42/1384	119/8220	7.4806e-07	8.33184e-06	5.10473e-06	ABCC1/AKT3/ASAH1/BCL2/CERS5/FYN/GAB2/GNA12/GNA13/GNAI1/GNAI3/GNAQ/MAPK1/MAPK10/MAPK13/MAPK8/NFKB1/NRAS/NSMAF/PDPK1/PIK3CB/PIK3R3/PLCB4/PPP2CA/PPP2CB/PPP2R2A/PPP2R3C/PPP2R5C/PPP2R5E/PTEN/RAC1/RHOA/ROCK1/S1PR1/SGMS1/SGMS2/SGPL1/SGPP2/SMPD2/SPHK1/SPTLC1/SPTLC2	42
hsa05120	Epithelial cell signaling in Helicobacter pylori infection	29/1384	70/8220	9.30409e-07	9.92944e-06	6.08354e-06	ADAM10/ADAM17/ATP6V0C/ATP6V1B2/ATP6V1C1/ATP6V1D/ATP6V1E1/ATP6V1F/ATP6V1G1/ATP6V1H/CASP3/CDC42/CXCL1/CXCL8/HBEGF/JAM2/JAM3/JUN/MAP2K4/MAPK10/MAPK13/MAPK8/NFKB1/NFKBIA/NOD1/PAK1/PLCG1/RAC1/TJP1	29
hsa04659	Th17 cell differentiation	39/1384	108/8220	9.5298e-07	9.92944e-06	6.08354e-06	AHR/HIF1A/HLA-DMA/HLA-DMB/HLA-DPA1/HLA-DQA1/HLA-DQB1/HLA-DRA/HLA-DRB1/HLA-DRB3/HLA-DRB5/IFNGR1/IFNGR2/IL1B/IL1R1/IL23A/IL2RG/IL6/JAK1/JUN/MAPK1/MAPK10/MAPK13/MAPK8/NFATC2/NFKB1/NFKBIA/PLCG1/PPP3CA/PPP3CC/RUNX1/SMAD2/SMAD3/SMAD4/STAT1/STAT6/TGFB1/TGFBR1/TGFBR2	39
hsa05215	Prostate cancer	36/1384	97/8220	1.16902e-06	1.17998e-05	7.2295e-06	AKT3/ATF4/BCL2/CREB3L1/CREB5/CTNNB1/E2F2/E2F3/ERG/FGFR1/GSK3B/GSTP1/IGF1R/INSRR/LEF1/MAPK1/NFKB1/NFKBIA/NRAS/PDGFA/PDGFC/PDGFD/PDGFRA/PDGFRB/PDPK1/PIK3CB/PIK3R3/PLAT/PLAU/PTEN/RB1/SOS2/SPINT1/TGFA/TMPRSS2/ZEB1	36
hsa04520	Adherens junction	29/1384	71/8220	1.32296e-06	1.29421e-05	7.92933e-06	ACTG1/ACTN4/CDC42/CSNK2A2/CSNK2A3/CTNNA1/CTNNB1/CTNND1/FER/FGFR1/FYN/IGF1R/IQGAP1/LEF1/LMO7/MAP3K7/MAPK1/PARD3/PTPN1/PTPRM/RAC1/RHOA/SMAD3/SMAD4/SNAI1/TGFBR1/TGFBR2/TJP1/VCL	29
hsa05210	Colorectal cancer	33/1384	86/8220	1.36233e-06	1.29421e-05	7.92933e-06	AKT3/APPL1/AREG/BAK1/BCL2/CASP3/CTNNB1/GADD45A/GSK3B/JUN/LEF1/MAPK1/MAPK10/MAPK8/NRAS/PIK3CB/PIK3R3/PMAIP1/RAC1/RALA/RALB/RALGDS/RHOA/SMAD2/SMAD3/SMAD4/SOS2/TGFA/TGFB1/TGFB2/TGFB3/TGFBR1/TGFBR2	33
hsa05146	Amoebiasis	37/1384	102/8220	1.5892e-06	1.4666e-05	8.98553e-06	ACTN4/CASP3/COL1A1/COL1A2/COL3A1/COL4A1/COL4A2/COL4A5/CXCL1/CXCL8/GNAQ/GNAS/IL1B/IL1R1/IL6/ITGAM/ITGB2/LAMA1/LAMA2/LAMA3/LAMA4/LAMA5/LAMB1/LAMB3/LAMC1/LAMC2/LAMC3/NFKB1/PIK3CB/PIK3R3/PLCB4/SERPINB9/TGFB1/TGFB2/TGFB3/TLR4/VCL	37
hsa04530	Tight junction	53/1384	169/8220	1.98822e-06	1.75855e-05	1.07742e-05	ACTG1/ACTN4/ACTR2/ACTR3/AMOTL2/ARHGAP17/ARHGEF18/ARHGEF2/ARPC2/ARPC3/ARPC5/CDC42/CFTR/CLDN1/CLDN10/CLDN11/CLDN16/CLDN4/CLDN6/CLDN7/CTTN/DLG3/EZR/HCLS1/ITGB1/JAM2/JAM3/JUN/MAPK10/MAPK8/MSN/MYH9/MYL12A/MYL12B/MYL6/PARD3/PARD6B/PPP2CA/PPP2CB/PPP2R2A/PRKAA2/PRKAB2/PRKCI/RAB8B/RAC1/RAP1A/RHOA/ROCK1/RUNX1/TJP1/TUBA1A/TUBA1B/YBX3	53
hsa05212	Pancreatic cancer	30/1384	76/8220	2.05192e-06	1.75855e-05	1.07742e-05	AKT3/BAK1/BCL2L1/CDC42/CDK6/E2F2/E2F3/GADD45A/JAK1/MAPK1/MAPK10/MAPK8/NFKB1/PIK3CB/PIK3R3/RAC1/RALA/RALB/RALGDS/RB1/SMAD2/SMAD3/SMAD4/STAT1/TGFA/TGFB1/TGFB2/TGFB3/TGFBR1/TGFBR2	30
hsa05321	Inflammatory bowel disease	27/1384	65/8220	2.06888e-06	1.75855e-05	1.07742e-05	HLA-DMA/HLA-DMB/HLA-DPA1/HLA-DQA1/HLA-DQB1/HLA-DRA/HLA-DRB1/HLA-DRB3/HLA-DRB5/IFNGR1/IFNGR2/IL18/IL1B/IL23A/IL2RG/IL6/JUN/NFKB1/SMAD2/SMAD3/STAT1/STAT6/TGFB1/TGFB2/TGFB3/TLR4/TLR5	27
hsa05166	Human T-cell leukemia virus 1 infection	65/1384	222/8220	2.1353e-06	1.76847e-05	1.0835e-05	ADCY3/AKT3/ANAPC10/ATF4/B2M/BCL2L1/CCND2/CDC16/CREB3L1/CREB5/CRTC3/E2F2/E2F3/EGR1/ELK4/ETS1/HLA-A/HLA-B/HLA-C/HLA-DMA/HLA-DMB/HLA-DPA1/HLA-DQA1/HLA-DQB1/HLA-DRA/HLA-DRB1/HLA-DRB3/HLA-DRB5/HLA-E/HLA-G/IL1R1/IL2RG/IL6/ITGB2/JAK1/JUN/MAP2K4/MAPK1/MAPK10/MAPK8/MMP7/NFATC2/NFKB1/NFKB2/NFKBIA/NRAS/PIK3CB/PIK3R3/PPP3CA/PPP3CC/PTEN/RB1/RELB/SLC25A5/SLC25A6/SMAD2/SMAD3/SMAD4/TGFB1/TGFB2/TGFB3/TGFBR1/TGFBR…	65
hsa05164	Influenza A	53/1384	171/8220	2.95274e-06	2.38434e-05	1.46083e-05	ACTG1/ADAR/AKT3/APAF1/BAK1/CALCOCO2/CASP3/CASP8/CCL2/CDK6/CXCL10/CXCL8/DNAJB1/EIF2AK2/FAS/HLA-DMA/HLA-DMB/HLA-DPA1/HLA-DQA1/HLA-DQB1/HLA-DRA/HLA-DRB1/HLA-DRB3/HLA-DRB5/HNRNPUL1/IFNA14/IFNAR2/IFNGR1/IFNGR2/IL18/IL1B/IL6/IRF9/JAK1/KPNA2/KPNA5/MAPK1/MX2/NFKB1/NFKBIA/NUP98/PIK3CB/PIK3R3/RAB11A/RAB11B/SLC25A5/SLC25A6/STAT1/TBK1/TLR4/TLR7/TMPRSS2/TNFRSF10B	53
hsa05170	Human immunodeficiency virus 1 infection	62/1384	212/8220	3.81812e-06	3.00793e-05	1.84289e-05	AKT3/AP1G2/AP1M1/AP1M2/AP1S2/AP1S3/APOBEC3A/APOBEC3B/APOBEC3C/APOBEC3F/APOBEC3G/B2M/BAK1/BCL2/BCL2L1/CALM1/CASP3/CASP8/CFL1/CUL4B/CXCR4/FAS/FBXW11/GNAI1/GNAI3/GNAQ/GNB1/GNB4/GNG11/GNG12/GNG5/HLA-A/HLA-B/HLA-C/HLA-E/HLA-G/IFNA14/ITPR3/JUN/MAP3K7/MAPK1/MAPK10/MAPK13/MAPK8/NFATC2/NFKB1/NFKBIA/NRAS/PAK1/PIK3CB/PIK3R3/PLCG1/PPP3CA/PPP3CC/RAC1/SAMHD1/SKP1/TAP1/TBK1/TLR4/TRAF5/WEE1	62
hsa05142	Chagas disease	36/1384	102/8220	4.57173e-06	3.51588e-05	2.1541e-05	AKT3/CASP8/CCL2/CFLAR/CXCL8/FAS/GNAI1/GNAI3/GNAQ/GNAS/IFNGR1/IFNGR2/IL1B/IL6/JUN/MAP2K4/MAPK1/MAPK10/MAPK13/MAPK8/NFKB1/NFKBIA/PIK3CB/PIK3R3/PLCB4/PPP2CA/PPP2CB/PPP2R2A/SERPINE1/SMAD2/TGFB1/TGFB2/TGFB3/TGFBR1/TGFBR2/TLR4	36
hsa04350	TGF-beta signaling pathway	34/1384	95/8220	5.89047e-06	4.4247e-05	2.71091e-05	ACVR1/BAMBI/BMPR1A/BMPR2/DCN/E2F5/FBN1/FMOD/GREM1/ID4/INHBA/INHBB/LTBP1/MAPK1/NEO1/PPP2CA/PPP2CB/RHOA/ROCK1/SKP1/SMAD2/SMAD3/SMAD4/SMAD5/SMAD7/SMURF1/SMURF2/SP1/TGFB1/TGFB2/TGFB3/TGFBR1/TGFBR2/THBS1	34
hsa04142	Lysosome	43/1384	132/8220	6.21102e-06	4.55945e-05	2.79347e-05	ACP5/AGA/AP1G2/AP1M1/AP1M2/AP1S2/AP1S3/AP3B1/AP3M2/AP4E1/AP4S1/ASAH1/ATP6V0C/ATP6V1H/CD63/CLTA/CTSA/CTSC/CTSE/CTSH/CTSK/CTSS/CTSV/ENTPD4/GLA/GLB1/GNPTAB/GNS/HEXA/HEXB/HGSNAT/HYAL2/LAMP1/LAMP2/LAPTM4B/LAPTM5/MAN2B1/NPC1/NPC2/PSAP/SCARB2/SLC11A1/SORT1	43
hsa05135	Yersinia infection	44/1384	137/8220	7.3554e-06	5.27954e-05	3.23465e-05	ACTG1/ACTR2/ACTR3/AKT3/ARF6/ARPC2/ARPC3/ARPC5/BCAR1/CCL2/CDC42/CXCL8/FCGR2A/GNAQ/GSK3B/IL18/IL1B/IL6/ITGA5/ITGB1/JUN/LCP2/MAP2K4/MAP3K7/MAPK1/MAPK10/MAPK13/MAPK8/NFATC2/NFKB1/NFKBIA/PIK3CB/PIK3R3/PIP5K1A/PKN1/PLCG1/RAC1/RHOA/ROCK1/RPS6KA1/RPS6KA3/TBK1/TLR4/WIPF1	44
hsa05412	Arrhythmogenic right ventricular cardiomyopathy	29/1384	77/8220	9.06117e-06	6.36252e-05	3.89817e-05	ACTG1/ATP2A2/CACNA1C/CACNA2D1/CTNNA1/CTNNB1/DAG1/DSC2/DSG2/DSP/GJA1/ITGA2/ITGA3/ITGA5/ITGA6/ITGAV/ITGB1/ITGB3/ITGB5/ITGB6/ITGB8/LAMA1/LAMA2/LEF1/LMNA/RYR2/SGCB/SGCD/SLC8A1	29
hsa04218	Cellular senescence	48/1384	156/8220	1.06938e-05	7.34916e-05	4.50266e-05	AKT3/CALM1/CAPN2/CCND2/CDK6/CXCL8/E2F2/E2F3/E2F5/ETS1/FBXW11/GADD45A/HIPK1/HLA-A/HLA-B/HLA-C/HLA-E/HLA-G/IL6/ITPR3/MAPK1/MAPK13/MCU/MRAS/NFATC2/NFKB1/NRAS/PIK3CB/PIK3R3/PPP1CB/PPP3CA/PPP3CC/PTEN/RB1/SERPINE1/SIRT1/SLC25A5/SLC25A6/SMAD2/SMAD3/TGFB1/TGFB2/TGFB3/TGFBR1/TGFBR2/TRAF3IP2/TRPV4/VDAC2	48
hsa05418	Fluid shear stress and atherosclerosis	44/1384	139/8220	1.11542e-05	7.50585e-05	4.59866e-05	ACTG1/ACVR1/AKT3/ARHGEF2/BCL2/BMPR1A/BMPR2/CALM1/CAV1/CAV2/CCL2/CDH5/CTNNB1/CYBA/DUSP1/EDN1/GSTP1/IL1B/IL1R1/ITGAV/ITGB3/JUN/MAP2K4/MAP3K7/MAPK10/MAPK13/MAPK8/MGST2/MMP2/NCF2/NFE2L2/NFKB1/NQO1/PDGFA/PECAM1/PIK3CB/PIK3R3/PLAT/PRKAA2/RAC1/RHOA/SUMO2/TRPV4/TXN	44
hsa05410	Hypertrophic cardiomyopathy	32/1384	90/8220	1.28615e-05	8.4781e-05	5.19434e-05	ACTG1/ATP2A2/CACNA1C/CACNA2D1/DAG1/EDN1/IL6/ITGA2/ITGA3/ITGA5/ITGA6/ITGAV/ITGB1/ITGB3/ITGB5/ITGB6/ITGB8/LAMA1/LAMA2/LMNA/PRKAA2/PRKAB2/RYR2/SGCB/SGCD/SLC8A1/TGFB1/TGFB2/TGFB3/TPM1/TPM2/TPM3	32
hsa04722	Neurotrophin signaling pathway	39/1384	119/8220	1.41644e-05	9.15022e-05	5.60613e-05	ABL1/AKT3/ARHGDIA/ARHGDIB/ATF4/BCL2/CALM1/CAMK2D/CDC42/GSK3B/IRAK2/IRAK3/JUN/MAPK1/MAPK10/MAPK13/MAPK8/NFKB1/NFKBIA/NRAS/NTF4/NTRK2/PDPK1/PIK3CB/PIK3R3/PLCG1/PRDM4/PRKCD/PSEN1/PSEN2/RAC1/RAP1A/RHOA/RIPK2/RPS6KA1/RPS6KA3/RPS6KA5/SORT1/SOS2	39
hsa05220	Chronic myeloid leukemia	28/1384	76/8220	2.08137e-05	0.00013182	8.07633e-05	ABL1/AKT3/BAK1/BCL2L1/BCR/CBL/CDK6/E2F2/E2F3/GAB2/GADD45A/HDAC2/MAPK1/NFKB1/NFKBIA/NRAS/PIK3CB/PIK3R3/RB1/RUNX1/SMAD3/SMAD4/SOS2/TGFB1/TGFB2/TGFB3/TGFBR1/TGFBR2	28
hsa04658	Th1 and Th2 cell differentiation	32/1384	92/8220	2.1521e-05	0.000133678	8.19017e-05	DLL1/HLA-DMA/HLA-DMB/HLA-DPA1/HLA-DQA1/HLA-DQB1/HLA-DRA/HLA-DRB1/HLA-DRB3/HLA-DRB5/IFNGR1/IFNGR2/IL2RG/JAG1/JAK1/JUN/MAML2/MAPK1/MAPK10/MAPK13/MAPK8/NFATC2/NFKB1/NFKBIA/NOTCH2/NOTCH3/PLCG1/PPP3CA/PPP3CC/RBPJ/STAT1/STAT6	32
hsa05162	Measles	43/1384	139/8220	2.63027e-05	0.000160298	9.82106e-05	ADAR/AKT3/APAF1/BAK1/BCL2/BCL2L1/CASP3/CASP8/CBLB/CCND2/CD46/CDK6/CSNK2A2/CSNK2A3/EIF2AK2/EIF3H/FAS/GSK3B/HSPA2/HSPA6/IFNA14/IFNAR2/IL1B/IL2RG/IL6/IRF9/JAK1/JUN/MAP3K7/MAPK10/MAPK8/MSN/MX2/NFKB1/NFKBIA/PIK3CB/PIK3R3/RAB9A/STAT1/TBK1/TLR4/TLR7/TNFAIP3	43
hsa04210	Apoptosis	42/1384	136/8220	3.40322e-05	0.000203563	0.000124718	ACTG1/AKT3/APAF1/ATF4/BAK1/BCL2/BCL2A1/BCL2L1/BIRC2/CAPN2/CASP2/CASP3/CASP8/CFLAR/CTSC/CTSH/CTSK/CTSS/CTSV/FAS/GADD45A/IL3RA/ITPR3/JUN/LMNA/MAPK1/MAPK10/MAPK8/MCL1/NFKB1/NFKBIA/NRAS/PDPK1/PIK3CB/PIK3R3/PMAIP1/PTPN13/SPTAN1/TNFRSF10B/TRAF1/TUBA1A/TUBA1B	42
hsa04926	Relaxin signaling pathway	40/1384	129/8220	4.6906e-05	0.000275466	0.000168772	ACTA2/ADCY3/AKT3/ATF4/COL1A1/COL1A2/COL3A1/COL4A1/COL4A2/COL4A5/CREB3L1/CREB5/EDN1/EDNRB/GNAI1/GNAI3/GNAS/GNB1/GNB4/GNG11/GNG12/GNG5/JUN/MAP2K4/MAPK1/MAPK10/MAPK13/MAPK8/MMP2/NFKB1/NFKBIA/NRAS/PIK3CB/PIK3R3/PLCB4/SMAD2/SOS2/TGFB1/TGFBR1/TGFBR2	40
hsa04064	NF-kappa B signaling pathway	34/1384	104/8220	5.23564e-05	0.000301984	0.000185019	BCL10/BCL2/BCL2A1/BCL2L1/BIRC2/CCL4/CCL4L2/CFLAR/CSNK2A2/CSNK2A3/CXCL1/CXCL8/CYLD/EDAR/GADD45A/IL1B/IL1R1/LTB/LY96/MALT1/MAP3K7/NFKB1/NFKB2/NFKBIA/PLAU/PLCG1/PTGS2/RELB/TLR4/TNFAIP3/TNFSF11/TRAF1/TRAF5/UBE2I	34
hsa05133	Pertussis	27/1384	76/8220	6.11182e-05	0.000346336	0.000212192	CALM1/CASP3/CFL1/CXCL5/CXCL6/CXCL8/GNAI1/GNAI3/IL1B/IL23A/IL6/IRF1/IRF8/ITGA5/ITGAM/ITGB1/ITGB2/JUN/LY96/MAPK1/MAPK10/MAPK13/MAPK8/NFKB1/NOD1/RHOA/TLR4	27
hsa05332	Graft-versus-host disease	18/1384	42/8220	6.34264e-05	0.000353219	0.000216409	CD86/FAS/HLA-A/HLA-B/HLA-C/HLA-DMA/HLA-DMB/HLA-DPA1/HLA-DQA1/HLA-DQB1/HLA-DRA/HLA-DRB1/HLA-DRB3/HLA-DRB5/HLA-E/HLA-G/IL1B/IL6	18
hsa05100	Bacterial invasion of epithelial cells	27/1384	77/8220	7.9256e-05	0.00043381	0.000265785	ACTG1/ACTR2/ACTR3/ARHGAP10/ARPC2/ARPC3/ARPC5/BCAR1/CAV1/CAV2/CBL/CD2AP/CDC42/CLTA/CTNNA1/CTNNB1/CTTN/DNM1/HCLS1/ILK/ITGA5/ITGB1/PIK3CB/PIK3R3/RAC1/RHOA/VCL	27
hsa04010	MAPK signaling pathway	75/1384	294/8220	8.05839e-05	0.00043381	0.000265785	AKT3/ANGPT1/AREG/ATF4/CACNA1C/CACNA2D1/CASP3/CDC42/CSF1/DUSP1/DUSP4/DUSP5/DUSP6/DUSP7/EFNA5/ELK4/EPHA2/FAS/FGFR1/FLNA/FLNB/FLNC/GADD45A/GNA12/GNG12/HSPA2/HSPA6/IGF1R/IL1B/IL1R1/JUN/JUND/KITLG/MAP2K4/MAP3K2/MAP3K7/MAP4K3/MAP4K4/MAPK1/MAPK10/MAPK13/MAPK8/MAX/MRAS/NF1/NFKB1/NFKB2/NRAS/NTF4/NTRK2/PAK1/PDGFA/PDGFC/PDGFD/PDGFRA/PDGFRB/PLA2G4A/PPP3CA/PPP3CC/RAC1/RAP1A/RASA2/RELB/RPS6KA1/RPS6KA3/RPS6KA5/…	75
hsa04657	IL-17 signaling pathway	31/1384	94/8220	9.19936e-05	0.000487114	0.000298443	CASP3/CASP8/CCL2/CCL20/CXCL1/CXCL10/CXCL5/CXCL6/CXCL8/FOSB/GSK3B/IL17RE/IL1B/IL6/JUN/JUND/MAP3K7/MAPK1/MAPK10/MAPK13/MAPK6/MAPK8/NFKB1/NFKBIA/PTGS2/SRSF1/TBK1/TNFAIP3/TRAF3IP2/TRAF5/USP25	31
hsa04611	Platelet activation	38/1384	124/8220	9.5289e-05	0.000496425	0.000304148	ACTG1/ADCY3/AKT3/COL1A1/COL1A2/COL3A1/F2R/FCGR2A/FYN/GNA13/GNAI1/GNAI3/GNAQ/GNAS/ITGA2/ITGB1/ITGB3/ITPR3/LCP2/MAPK1/MAPK13/MYL12A/MYL12B/PIK3CB/PIK3CG/PIK3R3/PIK3R5/PLA2G4A/PLCB4/PPP1CB/PPP1R12A/PRKCI/PTGIR/RAP1A/RHOA/ROCK1/TBXAS1/VAMP8	38
hsa04015	Rap1 signaling pathway	57/1384	210/8220	9.75447e-05	0.00050011	0.000306406	ACTG1/ADCY3/AKT3/ANGPT1/BCAR1/CALM1/CDC42/CSF1/CTNNB1/CTNND1/EFNA5/ENAH/EPHA2/F2R/FGFR1/GNAI1/GNAI3/GNAQ/GNAS/GRIN2A/IGF1R/ITGAM/ITGB1/ITGB2/ITGB3/KITLG/LCP2/LPAR1/MAPK1/MAPK13/MRAS/NRAS/PARD3/PARD6B/PDGFA/PDGFC/PDGFD/PDGFRA/PDGFRB/PIK3CB/PIK3R3/PLCB4/PLCE1/PLCG1/PRKCI/PRKD1/PRKD3/RAC1/RALA/RALB/RALGDS/RAP1A/RAPGEF5/RHOA/SIPA1L1/SIPA1L2/THBS1	57
hsa04620	Toll-like receptor signaling pathway	33/1384	104/8220	0.000129088	0.000651489	0.000399153	AKT3/CASP8/CCL4/CCL4L2/CD86/CTSK/CXCL10/CXCL11/CXCL8/IFNA14/IFNAR2/IL1B/IL6/JUN/LY96/MAP2K4/MAP3K7/MAPK1/MAPK10/MAPK13/MAPK8/NFKB1/NFKBIA/PIK3CB/PIK3R3/RAC1/SPP1/STAT1/TBK1/TLR4/TLR5/TLR7/TLR8	33
hsa03250	Viral life cycle - HIV-1	23/1384	63/8220	0.000131357	0.000652742	0.00039992	AFF4/APOBEC3A/APOBEC3B/APOBEC3C/APOBEC3F/APOBEC3G/BICD2/CCNT1/CHMP4B/CXCR4/ELL/MAP1B/MLLT3/MX2/NELFCD/NELFE/NUP153/PPIA/RANBP2/SAMHD1/SMARCB1/TSG101/VPS4B	23
hsa05330	Allograft rejection	16/1384	38/8220	0.000207226	0.00101415	0.000621349	CD86/FAS/HLA-A/HLA-B/HLA-C/HLA-DMA/HLA-DMB/HLA-DPA1/HLA-DQA1/HLA-DQB1/HLA-DRA/HLA-DRB1/HLA-DRB3/HLA-DRB5/HLA-E/HLA-G	16
hsa04640	Hematopoietic cell lineage	31/1384	99/8220	0.000266637	0.00128543	0.000787552	CD19/CD24/CD34/CD44/CD59/CD9/CSF1/CSF2RA/CSF3R/FCGR1A/HLA-DMA/HLA-DMB/HLA-DPA1/HLA-DQA1/HLA-DQB1/HLA-DRA/HLA-DRB1/HLA-DRB3/HLA-DRB5/IL1B/IL1R1/IL3RA/IL6/IL7R/ITGA2/ITGA3/ITGA5/ITGA6/ITGAM/ITGB3/KITLG	31
hsa05160	Hepatitis C	44/1384	157/8220	0.000275723	0.00130968	0.000802413	AKT3/APAF1/BAK1/CASP3/CASP8/CDK6/CFLAR/CLDN1/CLDN10/CLDN11/CLDN16/CLDN4/CLDN6/CLDN7/CTNNB1/CXCL10/E2F2/E2F3/EIF2AK2/EIF3E/FAS/GSK3B/IFNA14/IFNAR2/IRF9/JAK1/MAPK1/MX2/NFKB1/NFKBIA/NRAS/PIAS1/PIK3CB/PIK3R3/PPP2CA/PPP2CB/PPP2R2A/RB1/SOS2/STAT1/TBK1/YWHAH/YWHAQ/YWHAZ	44
hsa04072	Phospholipase D signaling pathway	42/1384	148/8220	0.000280861	0.00131475	0.00080552	ADCY3/AGPAT4/AKT3/ARF6/CXCL8/CYTH2/CYTH3/DGKA/DGKD/DGKH/DNM1/F2R/FYN/GAB2/GNA12/GNA13/GNAS/KITLG/LPAR1/LPAR6/MAPK1/MRAS/NRAS/PDGFA/PDGFC/PDGFD/PDGFRA/PDGFRB/PIK3CB/PIK3CG/PIK3R3/PIK3R5/PIP5K1A/PLA2G4A/PLCB4/PLCG1/RALA/RALB/RALGDS/RHOA/SOS2/SPHK1	42
hsa04940	Type I diabetes mellitus	17/1384	43/8220	0.00032837	0.00151519	0.000928323	CD86/FAS/HLA-A/HLA-B/HLA-C/HLA-DMA/HLA-DMB/HLA-DPA1/HLA-DQA1/HLA-DQB1/HLA-DRA/HLA-DRB1/HLA-DRB3/HLA-DRB5/HLA-E/HLA-G/IL1B	17
hsa05414	Dilated cardiomyopathy	30/1384	96/8220	0.000346007	0.00157409	0.000964408	ACTG1/ADCY3/ATP2A2/CACNA1C/CACNA2D1/DAG1/GNAS/ITGA2/ITGA3/ITGA5/ITGA6/ITGAV/ITGB1/ITGB3/ITGB5/ITGB6/ITGB8/LAMA1/LAMA2/LMNA/RYR2/SGCB/SGCD/SLC8A1/TGFB1/TGFB2/TGFB3/TPM1/TPM2/TPM3	30
hsa05225	Hepatocellular carcinoma	46/1384	168/8220	0.00036032	0.00161644	0.000990353	ACTG1/AKT3/ARID2/BAK1/BCL2L1/BRD7/CDK6/CSNK1A1/CTNNB1/DPF3/E2F2/E2F3/FZD6/GADD45A/GSK3B/GSTP1/IGF1R/LEF1/LRP6/MAPK1/MGST2/NFE2L2/NQO1/NRAS/PHF10/PIK3CB/PIK3R3/PLCG1/PTEN/RB1/SMAD2/SMAD3/SMAD4/SMARCA4/SMARCB1/SMARCC1/SMARCD1/SMARCD3/SOS2/TGFA/TGFB1/TGFB2/TGFB3/TGFBR1/TGFBR2/WNT5A	46
hsa04062	Chemokine signaling pathway	51/1384	192/8220	0.000392915	0.00173851	0.00106515	ADCY3/AKT3/BCAR1/CCL18/CCL2/CCL20/CCL28/CCL4/CCL4L2/CCR2/CDC42/CX3CL1/CXCL1/CXCL10/CXCL11/CXCL16/CXCL5/CXCL6/CXCL8/CXCR4/GNAI1/GNAI3/GNAQ/GNB1/GNB4/GNG11/GNG12/GNG5/GRK5/GSK3B/ITK/MAPK1/NFKB1/NFKBIA/NRAS/PAK1/PARD3/PIK3CB/PIK3CG/PIK3R3/PIK3R5/PLCB4/PLCG1/PREX1/PRKCD/RAC1/RAP1A/RHOA/ROCK1/SOS2/STAT1	51
hsa04014	Ras signaling pathway	60/1384	236/8220	0.000446996	0.00194775	0.00119334	ABL1/ABL2/AKT3/ANGPT1/ARF6/BCL2L1/CALM1/CDC42/CSF1/EFNA5/EPHA2/ETS1/EXOC2/FGFR1/GAB2/GNB1/GNB4/GNG11/GNG12/GNG5/GRIN2A/IGF1R/KITLG/KSR1/MAPK1/MAPK10/MAPK8/MRAS/NF1/NFKB1/NRAS/NTF4/NTRK2/PAK1/PDGFA/PDGFC/PDGFD/PDGFRA/PDGFRB/PIK3CB/PIK3R3/PLA2G4A/PLCE1/PLCG1/RAC1/RALA/RALB/RALGAPB/RALGDS/RAP1A/RAPGEF5/RASA2/RASA3/RASAL2/REL/RHOA/SOS2/STK4/TBK1/TGFA	60
hsa04962	Vasopressin-regulated water reabsorption	17/1384	44/8220	0.000452263	0.00194775	0.00119334	ADCY3/ARHGDIA/ARHGDIB/CREB3L1/CREB5/DCTN2/DCTN4/DCTN5/DYNC1H1/DYNC1I2/DYNC1LI2/DYNC2H1/DYNC2LI1/GNAS/RAB11A/RAB11B/STX4	17
hsa04390	Hippo signaling pathway	43/1384	157/8220	0.000549543	0.00233556	0.00143094	ACTG1/AREG/BIRC2/BMPR1A/BMPR2/CCND2/CSNK1D/CSNK1E/CTNNA1/CTNNB1/DLG3/FBXW11/FRMD6/FZD6/GSK3B/ITGB2/LATS2/LEF1/MOB1A/PARD3/PARD6B/PPP1CB/PPP2CA/PPP2CB/PPP2R2A/PRKCI/SERPINE1/SMAD2/SMAD3/SMAD4/SMAD7/TEAD1/TGFB1/TGFB2/TGFB3/TGFBR1/TGFBR2/TP53BP2/WNT5A/WWTR1/YWHAH/YWHAQ/YWHAZ	43
hsa05161	Hepatitis B	44/1384	162/8220	0.000578358	0.0024261	0.00148641	AKT3/APAF1/ATF4/BCL2/CASP3/CASP8/CREB3L1/CREB5/CXCL8/E2F2/E2F3/FAS/HSPG2/IFNA14/IL6/JAK1/JUN/MAP2K4/MAP3K7/MAPK1/MAPK10/MAPK13/MAPK8/NFATC2/NFKB1/NFKBIA/NRAS/PIK3CB/PIK3R3/RB1/SMAD3/SMAD4/SOS2/STAT1/STAT6/TBK1/TGFB1/TGFB2/TGFB3/TGFBR1/TGFBR2/TLR4/YWHAQ/YWHAZ	44
hsa04919	Thyroid hormone signaling pathway	35/1384	121/8220	0.000597897	0.00247591	0.00151693	ACTG1/AKT3/ATP1A1/ATP1B1/ATP1B2/ATP1B3/ATP2A2/CTNNB1/FXYD2/GSK3B/HDAC2/HIF1A/ITGAV/ITGB3/MAPK1/MED13L/MED14/MED17/MED27/MED30/MED4/NCOA3/NOTCH2/NOTCH3/NRAS/PDPK1/PFKP/PIK3CB/PIK3R3/PLCB4/PLCD3/PLCE1/PLCG1/SLC9A1/STAT1	35
hsa04621	NOD-like receptor signaling pathway	49/1384	186/8220	0.000620621	0.00253747	0.00155465	ANTXR1/ATG16L1/ATG5/BCL2/BCL2L1/BIRC2/CARD16/CASP8/CCL2/CXCL1/CXCL8/CYBA/DNM1L/GABARAP/GBP2/IFI16/IFNA14/IFNAR2/IL18/IL1B/IL6/IRF9/ITPR3/JAK1/JUN/MAP1LC3B/MAP3K7/MAPK1/MAPK10/MAPK13/MAPK8/MCU/NFKB1/NFKBIA/NOD1/PANX1/PKN1/PLCB4/PRKCD/RHOA/RIPK2/STAT1/TANK/TBK1/TLR4/TNFAIP3/TRAF5/TXN/VDAC2	49
hsa00600	Sphingolipid metabolism	19/1384	53/8220	0.000644412	0.00260181	0.00159407	ACER3/ASAH1/B4GALT5/CERK/CERS5/GLA/GLB1/HEXA/HEXB/PSAP/SGMS1/SGMS2/SGPL1/SGPP2/SMPD2/SPHK1/SPTLC1/SPTLC2/UGCG	19
hsa04660	T cell receptor signaling pathway	31/1384	104/8220	0.000690696	0.00272558	0.0016699	AKT3/BCL10/CBLB/CDC42/CTLA4/FYN/GSK3B/ITK/JUN/LCP2/MALT1/MAP3K7/MAPK1/MAPK10/MAPK13/MAPK8/NCK2/NFATC2/NFKB1/NFKBIA/NRAS/PAK1/PDPK1/PIK3CB/PIK3R3/PLCG1/PPP3CA/PPP3CC/PTPRC/RHOA/SOS2	31
hsa04612	Antigen processing and presentation	25/1384	78/8220	0.000691943	0.00272558	0.0016699	B2M/CD74/CTSS/HLA-A/HLA-B/HLA-C/HLA-DMA/HLA-DMB/HLA-DPA1/HLA-DQA1/HLA-DQB1/HLA-DRA/HLA-DRB1/HLA-DRB3/HLA-DRB5/HLA-E/HLA-G/HSPA2/HSPA6/IFI30/KLRC3/NFYA/RFX5/RFXANK/TAP1	25
hsa05417	Lipid and atherosclerosis	54/1384	215/8220	0.00114523	0.00442648	0.002712	ABCG1/AKT3/APAF1/ATF4/ATF6/BCL2/BCL2L1/CALM1/CAMK2D/CASP3/CASP8/CCL2/CDC42/CXCL1/CXCL8/CYBA/FAS/GSK3B/HSPA2/HSPA6/IFNA14/IL18/IL1B/IL6/JUN/LY96/MAP2K4/MAP3K7/MAPK1/MAPK10/MAPK13/MAPK8/MIB1/NCF2/NFATC2/NFE2L2/NFKB1/NFKBIA/NRAS/OLR1/PDPK1/PIK3CB/PIK3R3/PLCB4/PLCG1/PPP3CA/PPP3CC/RAC1/RAP1A/RHOA/TANK/TBK1/TLR4/TNFRSF10B	54
hsa05231	Choline metabolism in cancer	29/1384	98/8220	0.00115116	0.00442648	0.002712	AKT3/CHKA/DGKA/DGKD/DGKH/GPCPD1/HIF1A/JUN/MAPK1/MAPK10/MAPK8/NRAS/PDGFA/PDGFC/PDGFD/PDGFRA/PDGFRB/PDPK1/PIK3CB/PIK3R3/PIP5K1A/PLA2G4A/PLCG1/RAC1/RALGDS/SLC44A2/SLC44A3/SOS2/SP1	29
hsa04371	Apelin signaling pathway	38/1384	139/8220	0.00116791	0.00443806	0.0027191	ACTA2/ADCY3/AKT3/CALM1/EGR1/GNA13/GNAI1/GNAI3/GNAQ/GNB1/GNB4/GNG11/GNG12/GNG5/ITPR3/JAG1/MAP1LC3B/MAPK1/MRAS/NOTCH3/NRAS/NRF1/PIK3CG/PIK3R5/PLAT/PLCB4/PRKAA2/PRKAB2/RYR2/SERPINE1/SLC8A1/SLC9A1/SMAD2/SMAD3/SMAD4/SPHK1/SPP1/TGFBR1	38
hsa04974	Protein digestion and absorption	30/1384	103/8220	0.00126485	0.00475053	0.00291054	ATP1A1/ATP1B1/ATP1B2/ATP1B3/COL10A1/COL11A1/COL12A1/COL13A1/COL14A1/COL15A1/COL1A1/COL1A2/COL25A1/COL2A1/COL3A1/COL4A1/COL4A2/COL4A5/COL5A1/COL5A2/COL6A1/COL6A2/COL6A3/CPA3/ELN/FXYD2/SLC38A2/SLC3A1/SLC7A7/SLC8A1	30
hsa04261	Adrenergic signaling in cardiomyocytes	41/1384	154/8220	0.00133973	0.00497395	0.00304743	ADCY3/AKT3/ATF4/ATP1A1/ATP1B1/ATP1B2/ATP1B3/ATP2A2/ATP2B1/BCL2/CACNA1C/CACNA2D1/CALM1/CAMK2D/CREB3L1/CREB5/CREM/FXYD2/GNAI1/GNAI3/GNAQ/GNAS/MAPK1/MAPK13/PIK3CG/PIK3R5/PLCB4/PPP1CB/PPP2CA/PPP2CB/PPP2R2A/PPP2R3C/PPP2R5C/PPP2R5E/RPS6KA5/RYR2/SLC8A1/SLC9A1/TPM1/TPM2/TPM3	41
hsa04068	FoxO signaling pathway	36/1384	131/8220	0.00140572	0.00515962	0.00316118	AKT3/CCND2/CSNK1E/FBXO32/GABARAP/GADD45A/HOMER1/HOMER3/IGF1R/IL6/IL7R/MAPK1/MAPK10/MAPK13/MAPK8/NRAS/PDPK1/PIK3CB/PIK3R3/PLK2/PLK3/PRKAA2/PRKAB2/PTEN/S1PR1/SIRT1/SMAD3/SMAD4/SOS2/STK4/TGFB1/TGFB2/TGFB3/TGFBR1/TGFBR2/USP7	36
hsa04140	Autophagy - animal	38/1384	141/8220	0.00155402	0.00563986	0.00345541	AKT3/ATG16L1/ATG5/BCL2/BCL2L1/CFLAR/DAPK3/GABARAP/HIF1A/HMGB1/IGBP1/IGF1R/LAMP1/LAMP2/MAP1LC3B/MAP3K7/MAPK1/MAPK10/MAPK8/MRAS/NRAS/PDPK1/PIK3CB/PIK3R3/PPP2CA/PPP2CB/PRKAA2/PRKCD/PTEN/RB1CC1/RRAGA/RRAGC/SH3GLB1/TANK/TBK1/ULK2/VAMP8/WDR41	38
hsa05134	Legionellosis	19/1384	57/8220	0.00175703	0.00630579	0.00386341	APAF1/CASP3/CASP8/CXCL1/CXCL8/EEF1A1/EEF1G/HSPA2/HSPA6/IL18/IL1B/IL6/ITGAM/ITGB2/NFKB1/NFKB2/NFKBIA/TLR4/TLR5	19
hsa05320	Autoimmune thyroid disease	18/1384	53/8220	0.00181269	0.00643406	0.003942	CD86/CTLA4/FAS/HLA-A/HLA-B/HLA-C/HLA-DMA/HLA-DMB/HLA-DPA1/HLA-DQA1/HLA-DQB1/HLA-DRA/HLA-DRB1/HLA-DRB3/HLA-DRB5/HLA-E/HLA-G/IFNA14	18
hsa01521	EGFR tyrosine kinase inhibitor resistance	24/1384	79/8220	0.00201056	0.00705881	0.00432477	AKT3/AXL/BCL2/BCL2L1/EIF4E2/GAS6/GSK3B/IGF1R/IL6/JAK1/MAPK1/NF1/NRAS/PDGFA/PDGFC/PDGFD/PDGFRA/PDGFRB/PIK3CB/PIK3R3/PLCG1/PTEN/SOS2/TGFA	24
hsa04928	Parathyroid hormone synthesis, secretion and action	30/1384	106/8220	0.00207607	0.00721045	0.00441768	ADCY3/AKAP13/ATF4/BCL2/CREB3L1/CREB5/EGR1/FGFR1/GNA12/GNA13/GNAI1/GNAI3/GNAQ/GNAS/HBEGF/ITPR3/JUND/LRP6/MAPK1/MMP14/MMP15/MMP16/PDE4B/PDE4D/PLCB4/PTHLH/RHOA/SLC34A2/SP1/TNFSF11	30
hsa05203	Viral carcinogenesis	50/1384	204/8220	0.0029624	0.0101793	0.00623664	ACTN4/ATF4/BAK1/CASP3/CASP8/CCND2/CDC42/CDK6/CHD4/CREB3L1/CREB5/EIF2AK2/GSN/GTF2A1L/GTF2E2/HDAC2/HDAC7/HDAC9/HLA-A/HLA-B/HLA-C/HLA-E/HLA-G/HNRNPK/IRF9/JAK1/JUN/MAPK1/NFKB1/NFKB2/NFKBIA/NRAS/PIK3CB/PIK3R3/PKM/PMAIP1/RAC1/RASA2/RB1/RBPJ/REL/RHOA/SNW1/TRAF1/TRAF5/UBE3A/USP7/YWHAH/YWHAQ/YWHAZ	50
hsa04310	Wnt signaling pathway	43/1384	170/8220	0.00302792	0.0102949	0.00630746	BAMBI/CAMK2D/CCND2/CHD8/CSNK1A1/CSNK1E/CSNK2A2/CSNK2A3/CTNNB1/CTNND2/DAAM1/DKK1/FBXW11/FRZB/FZD6/GPC4/GSK3B/JUN/LEF1/LRP6/MAP3K7/MAPK10/MAPK8/MMP7/NFATC2/PLCB4/PPARD/PPP3CA/PPP3CC/PRICKLE2/PSEN1/RAC1/RHOA/ROR2/RYK/SFRP1/SFRP4/SKP1/SMAD3/SMAD4/TBL1XR1/TLE4/WNT5A	43
hsa05211	Renal cell carcinoma	21/1384	69/8220	0.003647	0.0122706	0.00751794	AKT3/ARNT2/CDC42/EGLN1/EGLN3/ETS1/HIF1A/JUN/MAPK1/NRAS/PAK1/PIK3CB/PIK3R3/RAC1/RAP1A/SOS2/TGFA/TGFB1/TGFB2/TGFB3/VHL	21
hsa05202	Transcriptional misregulation in cancer	47/1384	193/8220	0.00443596	0.0147713	0.00905002	ARNT2/BAK1/BCL2A1/BCL2L1/BIRC2/CCND2/CCNT1/CD86/CDK14/CXCL8/DDX5/DOT1L/DUSP6/ELANE/ELK4/ERG/ETV6/FCGR1A/FUS/FUT8/GADD45A/HDAC2/IGF1R/IL6/ITGAM/JMJD1C/KDM6A/MAX/MLF1/MLLT3/NFKB1/NR4A3/PAX5/PBX1/PDGFA/PER2/PLAT/PLAU/PROM1/REL/RUNX1/SP1/SPINT1/TGFBR2/TMPRSS2/TRAF1/ZEB1	47
hsa04217	Necroptosis	40/1384	159/8220	0.00458858	0.0151236	0.00926587	BCL2/BIRC2/CAMK2D/CAPN2/CASP8/CFLAR/CHMP1B/CHMP3/CHMP4B/CHMP4C/CHMP5/CYLD/DNM1L/EIF2AK2/FAS/FTH1/GLUD2/HMGB1/IFNA14/IFNAR2/IFNGR1/IFNGR2/IL1B/IRF9/JAK1/MAPK10/MAPK8/MLKL/PLA2G4A/PPIA/SLC25A5/SLC25A6/STAT1/STAT6/TLR4/TNFAIP3/TNFRSF10B/TRAF5/VDAC2/VPS4B	40
hsa05110	Vibrio cholerae infection	16/1384	50/8220	0.00618791	0.0201888	0.0123692	ACTG1/ADCY3/ATP6V0C/ATP6V1B2/ATP6V1C1/ATP6V1D/ATP6V1E1/ATP6V1F/ATP6V1G1/ATP6V1H/CFTR/GNAS/KDELR3/PLCG1/SLC12A2/TJP1	16
hsa04022	cGMP-PKG signaling pathway	41/1384	167/8220	0.00651171	0.0210328	0.0128863	ADCY3/AKT3/ATF4/ATP1A1/ATP1B1/ATP1B2/ATP1B3/ATP2A2/ATP2B1/CACNA1C/CALM1/CREB3L1/CREB5/EDNRA/EDNRB/FXYD2/GNA12/GNA13/GNAI1/GNAI3/GNAQ/ITPR3/MAPK1/NFATC2/PDE3A/PDE5A/PIK3CG/PIK3R5/PLCB4/PPP1CB/PPP1R12A/PPP3CA/PPP3CC/RGS2/RHOA/ROCK1/SLC25A5/SLC25A6/SLC8A1/TRPC6/VDAC2	41
hsa04330	Notch signaling pathway	18/1384	59/8220	0.00665615	0.0212865	0.0130417	ADAM17/APH1A/APH1B/ATXN1/DLL1/HDAC2/HEY1/HEYL/JAG1/MAML2/NCSTN/NOTCH2/NOTCH3/PSEN1/PSEN2/RBPJ/SNW1/TLE4	18
hsa03040	Spliceosome	38/1384	154/8220	0.00788245	0.0249611	0.0152931	AQR/BUD31/DDX42/DDX5/DHX15/EIF4A3/FUS/HNRNPA1/HNRNPA1L2/HNRNPA3/HNRNPC/HNRNPK/HNRNPM/HNRNPU/HSPA2/HSPA6/LSM8/PRPF38B/PRPF40A/RBM17/RBM22/RBM8A/RNU5D-1/RNU5F-1/SF3A3/SMNDC1/SNRPA1/SNRPB/SNRPD1/SNRPE/SNRPG/SNW1/SRSF1/SRSF3/SRSF5/SYF2/U2AF1/WBP11	38
hsa04912	GnRH signaling pathway	25/1384	93/8220	0.00952726	0.0298767	0.0183048	ADCY3/ATF4/CACNA1C/CALM1/CAMK2D/CDC42/EGR1/GNAQ/GNAS/HBEGF/ITPR3/JUN/MAP2K4/MAP3K2/MAPK1/MAPK10/MAPK13/MAPK8/MMP14/MMP2/NRAS/PLA2G4A/PLCB4/PRKCD/SOS2	25
hsa01522	Endocrine resistance	26/1384	98/8220	0.009926	0.0308279	0.0188875	ADCY3/AKT3/BCL2/BIK/DLL1/E2F2/E2F3/GNAS/HBEGF/IGF1R/JAG1/JUN/MAPK1/MAPK10/MAPK13/MAPK8/MMP2/NCOA3/NOTCH2/NOTCH3/NRAS/PIK3CB/PIK3R3/RB1/SOS2/SP1	26
hsa05214	Glioma	21/1384	75/8220	0.0103701	0.0317169	0.0194322	AKT3/BAK1/CALM1/CAMK2D/CDK6/E2F2/E2F3/GADD45A/IGF1R/MAPK1/NRAS/PDGFA/PDGFRA/PDGFRB/PIK3CB/PIK3R3/PLCG1/PTEN/RB1/SOS2/TGFA	21
hsa04728	Dopaminergic synapse	33/1384	132/8220	0.0104086	0.0317169	0.0194322	AKT3/ATF4/CACNA1C/CALM1/CAMK2D/CREB3L1/CREB5/GNAI1/GNAI3/GNAQ/GNAS/GNB1/GNB4/GNG11/GNG12/GNG5/GRIN2A/GSK3B/ITPR3/KIF5B/MAPK10/MAPK13/MAPK8/PLCB4/PPP1CB/PPP2CA/PPP2CB/PPP2R2A/PPP2R3C/PPP2R5C/PPP2R5E/PPP3CA/PPP3CC	33
hsa03010	Ribosome	40/1384	167/8220	0.0109476	0.0330475	0.0202474	MRPL15/MRPL33/RPL10/RPL10A/RPL13A/RPL14/RPL15/RPL17/RPL22/RPL23/RPL23A/RPL26/RPL27/RPL28/RPL31/RPL32/RPL35A/RPL37/RPL37A/RPL38/RPL41/RPL5/RPL6/RPL7/RPL9/RPS14/RPS15/RPS15A/RPS18/RPS20/RPS27A/RPS27L/RPS29/RPS3/RPS3A/RPS4X/RPS7/RPS8/RPSA/RSL24D1	40
hsa04012	ErbB signaling pathway	23/1384	85/8220	0.0115893	0.0346605	0.0212357	ABL1/ABL2/AKT3/AREG/CAMK2D/CBL/CBLB/GSK3B/HBEGF/JUN/MAP2K4/MAPK1/MAPK10/MAPK8/NCK2/NRAS/NRG3/PAK1/PIK3CB/PIK3R3/PLCG1/SOS2/TGFA	23
hsa04672	Intestinal immune network for IgA production	15/1384	49/8220	0.0122537	0.0363114	0.0222471	CCL28/CD86/CXCR4/HLA-DMA/HLA-DMB/HLA-DPA1/HLA-DQA1/HLA-DQB1/HLA-DRA/HLA-DRB1/HLA-DRB3/HLA-DRB5/ICOSLG/IL6/TGFB1	15
hsa04137	Mitophagy - animal	20/1384	72/8220	0.0133334	0.0391517	0.0239873	ATF4/ATG5/BCL2L1/CALCOCO2/CSNK2A2/CSNK2A3/GABARAP/HIF1A/JUN/MAP1LC3B/MAPK10/MAPK8/MRAS/NRAS/RHOT1/RPS27A/SP1/TAX1BP1/TBK1/UBC	20
hsa05144	Malaria	15/1384	50/8220	0.0148533	0.0432218	0.026481	CCL2/CXCL8/IL18/IL1B/IL6/ITGB2/KLRB1/PECAM1/TGFB1/TGFB2/TGFB3/THBS1/THBS2/THBS3/TLR4	15
hsa03015	mRNA surveillance pathway	25/1384	97/8220	0.0163364	0.046696	0.0286095	EIF4A3/FUS/MSI2/PABPC1/PABPC3/PABPC4/PAPOLG/PCF11/PELO/PNN/PPP1CB/PPP2CA/PPP2CB/PPP2R2A/PPP2R3C/PPP2R5C/PPP2R5E/RBM8A/RNGTT/RNMT/RNPS1/SMG7/SRRM1/UPF3A/WDR82	25
hsa04666	Fc gamma R-mediated phagocytosis	25/1384	97/8220	0.0163364	0.046696	0.0286095	ACTR2/ACTR3/AKT3/ARF6/ARPC2/ARPC3/ARPC5/ASAP2/CDC42/CFL1/FCGR1A/FCGR2A/GAB2/GSN/MAPK1/PAK1/PIK3CB/PIK3R3/PIP5K1A/PLA2G4A/PLCG1/PRKCD/PTPRC/RAC1/SPHK1	25
hsa04540	Gap junction	23/1384	88/8220	0.0175884	0.0498338	0.030532	ADCY3/CSNK1D/GJA1/GNAI1/GNAI3/GNAQ/GNAS/HTR2B/ITPR3/LPAR1/MAP3K2/MAPK1/NRAS/PDGFA/PDGFC/PDGFD/PDGFRA/PDGFRB/PLCB4/SOS2/TJP1/TUBA1A/TUBA1B	23
hsa04750	Inflammatory mediator regulation of TRP channels	25/1384	98/8220	0.0185317	0.0520499	0.0318898	ADCY3/BDKRB1/CALM1/CAMK2D/F2RL1/GNAQ/GNAS/HTR2B/IL1B/IL1R1/ITPR3/MAPK10/MAPK13/MAPK8/PIK3CB/PIK3R3/PLA2G4A/PLCB4/PLCG1/PPP1CB/PRKCD/PRKCH/PTGER2/PTGER4/TRPV4	25
hsa03013	Nucleocytoplasmic transport	27/1384	108/8220	0.0192002	0.0534627	0.0327554	AHCTF1/EEF1A1/EIF4A3/IPO7/KPNA2/KPNA3/KPNA4/KPNA5/KPNB1/NUP133/NUP153/NUP188/NUP50/NUP93/NUP98/PNN/RANBP2/RANGAP1/RBM8A/RNPS1/SRRM1/SUMO2/TNPO1/TNPO2/UBE2I/UPF3A/XPO5	27
hsa04340	Hedgehog signaling pathway	16/1384	56/8220	0.019434	0.0536511	0.0328708	BCL2/BOC/CCND2/CSNK1A1/CSNK1D/CSNK1E/CUL3/DISP1/FBXW11/GLI3/GSK3B/KIF3A/SCUBE2/SMURF1/SMURF2/SPOPL	16
hsa04024	cAMP signaling pathway	50/1384	225/8220	0.0205221	0.056175	0.0344171	ABCC4/ADCY3/AKT3/ATP1A1/ATP1B1/ATP1B2/ATP1B3/ATP2A2/ATP2B1/CACNA1C/CALM1/CAMK2D/CFTR/CREB3L1/CREB5/EDN1/EDNRA/F2R/FXYD2/GABBR1/GLI3/GNAI1/GNAI3/GNAS/GRIN2A/JUN/MAPK1/MAPK10/MAPK8/NFKB1/NFKBIA/OXTR/PAK1/PDE10A/PDE3A/PDE4B/PDE4D/PIK3CB/PIK3R3/PLCE1/PPP1CB/PPP1R12A/PTGER2/RAC1/RAP1A/RHOA/ROCK1/RYR2/SLC9A1/SOX9	50
hsa04066	HIF-1 signaling pathway	27/1384	109/8220	0.0215582	0.0585152	0.0358509	AKT3/ALDOA/ANGPT1/BCL2/CAMK2D/EDN1/EGLN1/EGLN3/EIF4E2/ENO2/HIF1A/IFNGR1/IFNGR2/IGF1R/IL6/LDHB/MAPK1/NFKB1/PFKFB3/PFKP/PIK3CB/PIK3R3/PLCG1/SERPINE1/TIMP1/TLR4/VHL	27
hsa05218	Melanoma	19/1384	72/8220	0.026518	0.0707877	0.04337	AKT3/BAK1/CDK6/E2F2/E2F3/FGFR1/GADD45A/IGF1R/MAPK1/NRAS/PDGFA/PDGFC/PDGFD/PDGFRA/PDGFRB/PIK3CB/PIK3R3/PTEN/RB1	19
hsa05223	Non-small cell lung cancer	19/1384	72/8220	0.026518	0.0707877	0.04337	AKT3/BAK1/CDK6/E2F2/E2F3/FHIT/GADD45A/KIF5B/MAPK1/NRAS/PDPK1/PIK3CB/PIK3R3/PLCG1/RARB/RB1/SOS2/STK4/TGFA	19
hsa04964	Proximal tubule bicarbonate reclamation	8/1384	23/8220	0.0289404	0.0766159	0.0469408	AQP1/ATP1A1/ATP1B1/ATP1B2/ATP1B3/FXYD2/GLS/GLUD2	8
hsa00531	Glycosaminoglycan degradation	7/1384	19/8220	0.0293886	0.0766159	0.0469408	GLB1/GNS/HEXA/HEXB/HGSNAT/HPSE/HYAL2	7
hsa04664	Fc epsilon RI signaling pathway	18/1384	68/8220	0.0294129	0.0766159	0.0469408	AKT3/ALOX5AP/FYN/GAB2/LCP2/MAP2K4/MAPK1/MAPK10/MAPK13/MAPK8/NRAS/PDPK1/PIK3CB/PIK3R3/PLA2G4A/PLCG1/RAC1/SOS2	18
hsa00562	Inositol phosphate metabolism	19/1384	73/8220	0.0303799	0.0772654	0.0473387	FIG4/INPP1/IPPK/ISYNA1/ITPKB/ITPKC/MTMR2/PI4K2A/PI4KB/PIK3C2A/PIK3CB/PIK3CG/PIP5K1A/PLCB4/PLCD3/PLCE1/PLCG1/PTEN/SYNJ2	19
hsa01524	Platinum drug resistance	19/1384	73/8220	0.0303799	0.0772654	0.0473387	AKT3/APAF1/ATP7B/BAK1/BCL2/BCL2L1/BIRC2/CASP3/CASP8/ERCC1/FAS/GSTP1/MAPK1/MGST2/PDPK1/PIK3CB/PIK3R3/PMAIP1/TOP2B	19
hsa04115	p53 signaling pathway	19/1384	73/8220	0.0303799	0.0772654	0.0473387	APAF1/BCL2/BCL2L1/CASP3/CASP8/CCND2/CDK6/FAS/GADD45A/PERP/PMAIP1/PTEN/SERPINE1/SESN1/SHISA5/THBS1/TNFRSF10B/TP53I3/ZMAT3	19
hsa04215	Apoptosis - multiple species	10/1384	32/8220	0.0326312	0.0823428	0.0504496	APAF1/BAK1/BCL2/BCL2L1/BIRC2/CASP3/CASP8/MAPK10/MAPK8/PMAIP1	10
hsa05235	PD-L1 expression and PD-1 checkpoint pathway in cancer	22/1384	89/8220	0.0363478	0.0910103	0.0557599	AKT3/CSNK2A2/CSNK2A3/HIF1A/IFNGR1/IFNGR2/JAK1/JUN/MAPK1/MAPK13/NFATC2/NFKB1/NFKBIA/NRAS/PIK3CB/PIK3R3/PLCG1/PPP3CA/PPP3CC/PTEN/STAT1/TLR4	22
hsa04917	Prolactin signaling pathway	18/1384	70/8220	0.0385326	0.0957387	0.0586569	AKT3/CCND2/GSK3B/IRF1/MAPK1/MAPK10/MAPK13/MAPK8/NFKB1/NRAS/PIK3CB/PIK3R3/SOCS2/SOCS4/SOCS6/SOS2/STAT1/TNFSF11	18
hsa04630	JAK-STAT signaling pathway	37/1384	166/8220	0.0400841	0.0988333	0.0605529	AKT3/BCL2/BCL2L1/CCND2/CNTF/CSF2RA/CSF3R/IFNA14/IFNAR2/IFNGR1/IFNGR2/IL10RB/IL23A/IL2RG/IL3RA/IL6/IL7R/IRF9/JAK1/LIF/MCL1/OSM/PDGFA/PDGFRA/PDGFRB/PIAS1/PIAS3/PIK3CB/PIK3R3/SOCS2/SOCS4/SOCS6/SOS2/STAM/STAM2/STAT1/STAT6	37
hsa04392	Hippo signaling pathway - multiple species	9/1384	29/8220	0.0434494	0.106319	0.0651394	CSNK1E/FRMD6/LATS2/MOB1A/PAK1/RASSF2/RASSF4/TEAD1/WWTR1	9
hsa04971	Gastric acid secretion	19/1384	76/8220	0.0444814	0.108026	0.0661852	ACTG1/ADCY3/ATP1A1/ATP1B1/ATP1B2/ATP1B3/CALM1/CAMK2D/CFTR/EZR/GNAI1/GNAI3/GNAQ/GNAS/ITPR3/KCNJ15/KCNJ16/PLCB4/SLC9A1	19
hsa05224	Breast cancer	33/1384	147/8220	0.0460972	0.111115	0.0680775	AKT3/BAK1/CDK6/CSNK1A1/CTNNB1/DLL1/E2F2/E2F3/FGFR1/FZD6/GADD45A/GSK3B/HEY1/HEYL/IGF1R/JAG1/JUN/LEF1/LRP6/MAPK1/NCOA3/NFKB2/NOTCH2/NOTCH3/NRAS/PIK3CB/PIK3R3/PTEN/RB1/SOS2/SP1/TNFSF11/WNT5A	33
hsa04120	Ubiquitin mediated proteolysis	32/1384	142/8220	0.0467218	0.111786	0.0684888	ANAPC10/BIRC2/CBL/CBLB/CDC16/CUL3/CUL4B/FBXW11/PIAS1/PIAS3/RPS27A/SAE1/SKP1/SMURF1/SMURF2/TRIP12/UBC/UBE2A/UBE2B/UBE2D1/UBE2D2/UBE2E2/UBE2E3/UBE2I/UBE2N/UBE2Q2/UBE2R2/UBE2W/UBE2Z/UBE3A/VHL/WWP2	32
